# Supplementary material for: Taurocholic Acid and Glycocholic Acid Inhibit Inflammation and Activate Farnesoid X Receptor Expression in LPS-Stimulated Zebrafish and Macrophages
Source: MDPI journal article supplement (doi:10.3390/molecules28052005), 2023-02-21
Supplement: s1 [file s1]

Supplementary Materials for

**Taurocholic Acid and Glycocholic Acid Inhibit Inflammation and Activate Farnesoid X Receptor Expression in LPS-Stimulated Zebrafish and Macrophages**

**Table S1.** Primers used in this study.

| Gene                     | Forward(5'-3')         | Reverse(3'-5')         |
|--------------------------|------------------------|------------------------|
| (zebrafish)eF-1 $\alpha$ | AGAAGGCTGCCAAGACCAAG   | AGAGGTTGGGAAGAACACGC   |
| (zebrafish)il-6          | CGCTAAGGCAACTGGAAGAC   | CCAGACCACTGGGAAACACT   |
| (zebrafish)tnf- $\alpha$ | ACCAGGCCTTTTCTTCAGGT   | TTGCCTCCGTAGGATTCAG    |
| (zebrafish)ccl-2         | GTCTGGTGCTCTTCGCTTTC   | TGCAGAGAAGATGCGTCGTA   |
| (mice)gapdh              | AGGTCGGTGTGAACGGATTG   | GGGGTCGTTGATGGCAACA    |
| (mice)il-6               | CTGCAAGAGACTTCCATCCAG  | GGGGTCGTTGATGGCAACA    |
| (mice)tnf- $\alpha$      | CAGGCGGTGCCTATGTCTC    | CGATCACCCCGAAGTTCAGTAG |
| (mice)fxr                | GCTTGATGTGCTACAAAAGCTG | CGTGGTGATGGTTGAATGTCC  |

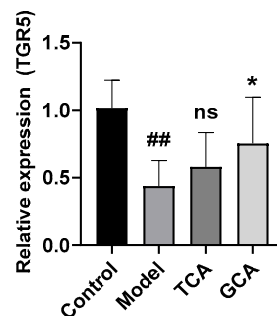

**Figure S1.** The mRNA levels of TGR5 in bile acids-supplemented macrophage inflammation model.
